# Supplementary material for: Efficient genome editing of an extreme thermophile, Thermus thermophilus, using a thermostable Cas9 variant
Source: PubMed Central journal article supplement (PMC8100143; doi:10.1038/s41598-021-89029-2), 2021-05-05
Supplement: 41598_2021_89029_MOESM1_ESM.pdf [file 41598_2021_89029_MOESM1_ESM.pdf]

1 **Supplementary files from manuscript:**

2 Efficient genome editing of an extreme thermophile, *Thermus thermophilus*, using a thermostable  
3 Cas9 variant

4

5 Bjorn Thor Adalsteinsson<sup>1\*</sup>, Thordis Kristjansdottir<sup>1,2</sup>, William Merre<sup>3</sup>, Alexandra Helleux<sup>4</sup>, Julia  
6 Dusaucy<sup>5</sup>, Mathilde Tourigny<sup>4</sup>, Olafur Fridjonsson<sup>1</sup>, Gudmundur Oli Hreggvidsson<sup>1,2</sup>

7 1. Matís, Reykjavík, Iceland; 2. University of Iceland, Reykjavík, Iceland; 3. Aix-Marseille Université,  
8 Marseille, France; 4. Université de Strasbourg, Strasbourg, France; 5. Université Pierre et Marie Curie,  
9 Paris, France; \*corresponding author (bjornth@matis.is)

10

1 **Supplementary file 1**

2 A generalized scheme of Cas9 genome editing in prokaryotes, using a plasmid based delivery system  
3 with kanamycin selection:

**I. Transformation, expression, antibiotic selection**

After transformation with a Cas9 genome editing plasmid, Cas9, gRNA and an antibiotic resistance gene (kanamycin in schematic) are expressed, and the plasmid is replicated.

Cells carrying the plasmid are selected by plating on media containing antibiotic. Cells that do not carry the plasmid die.

**II. Cas9 DSB and HDR**

Cas9 and gRNA cause a double strand break (DSB) in the targeted genomic locus. Three outcomes from this event are possible:

- Homology directed repair (HDR) occurs between the genome and a construct supplied on the plasmid (this scenario is demonstrated in schematic). This leads to a 'controlled' genome editing.
- Repair occurs independent of the construct supplied on the plasmid. Genome editing is not 'controlled'. Depending on genomic context, the cell may or may not survive (this scenario is not demonstrated in schematic).
- No repair occurs and the cell dies (this scenario is not demonstrated in schematic).

**III. Outcome**

In the example demonstrated the Cas9 genome editing plasmid was designed to generate a gene knock-out (KO). In the mutants, expression continues from the replicated plasmid, enabling continued growth on media containing antibiotic.

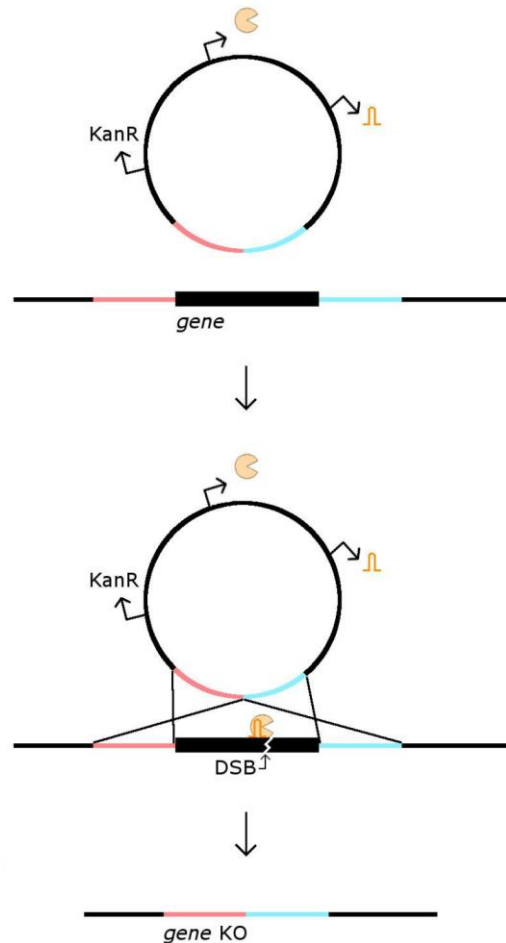

**Legend**

- KanR Kanamycin resistance enzyme
- Cas9 Cas9 enzyme
- gRNA guide RNA (gRNA)

**Notes:**

If Cas9 and/or gRNA were absent in the scenario depicted above, HDR may occur regardless in a small subset of cells. However, without the negative selection of Cas9:gRNA, both mutants and WT clones would grow. Unless the genome editing in question elicits phenotypic change, mutants must be distinguished from WT clones via genetic screening.

If a homologous recombination construct was absent in the scenario depicted above, the DSB would be fatal to cells unless: they perform non-homologous end-joining repair (which is rare in prokaryotes) leading to an indel mutation; or they perform HDR between the targeted locus and another locus in the genome, leading to stochastic and potentially large-scale genomic alterations.

4

1 **Supplementary file 2**

2 *cas9* genes in *Geobacillus* species

| Accession       | % Identical Sites | Organism                              | strain       |
|-----------------|-------------------|---------------------------------------|--------------|
| NZ_CP014335     | 87.90%            | <i>Geobacillus thermoleovorans</i>    | KCTC 3570    |
| NZ_JPYA01000050 | 86.80%            | <i>Geobacillus icigianus</i>          | G1w1         |
| NZ_LQYX01000092 | 86.80%            | <i>Geobacillus sp.</i>                | B4113_201601 |
| NZ_JQMN01000001 | 86.80%            | <i>Geobacillus subterraneus</i>       | PSS2         |
| NZ_JYBP01000003 | 87.10%            | <i>Geobacillus kaustophilus</i>       | Et7/4        |
| NZ_JYCF01000004 | 87.50%            | <i>Geobacillus kaustophilus</i>       | Et2/3        |
| NZ_BCQG01000002 | 87.60%            | <i>Geobacillus jurassicus</i>         | NBRC 107829  |
| NZ_AYSF01000013 | 88.40%            | <i>Geobacillus sp.</i>                | MAS1         |
| NZ_LQIE01000074 | 88.70%            | <i>Geobacillus stearothermophilus</i> | C1BS50MT1    |
| NZ_JYNW01000007 | 88.90%            | <i>Geobacillus stearothermophilus</i> | ATCC 12980   |
| NZ_LLS01000054  | 88.90%            | <i>Geobacillus sp.</i>                | Sah69        |
| NZ_JALS01000081 | 88.90%            | <i>Geobacillus stearothermophilus</i> | ATCC 7953    |
| NZ_LQYV01000072 | 89.00%            | <i>Geobacillus stearothermophilus</i> | B4109        |
| NZ_LUCR01000150 | 89.00%            | <i>Geobacillus stearothermophilus</i> | GS27         |
| NZ_CP008903     | 89.00%            | <i>Geobacillus sp.</i>                | LC300        |
| NC_022080       | 100.00%           | <i>Geobacillus sp.</i>                | JF8          |

3 Query coverage was 100%, except for sequence in genome NZ\_CP014335 where it was 86%.

4

1 **Supplementary file 3**

2 Cas9 enzymes in *Geobacillus* species

| Accession      | % Identical Sites | Organism                               | Strain      |
|----------------|-------------------|----------------------------------------|-------------|
| AKU27017.1     | 100%              | <i>Geobacillus sp.</i>                 | LC300       |
| WP_100664518.1 | 99%               | <i>Geobacillus sp.</i>                 | WSUCF-018B  |
| WP_138187407.1 | 99%               | <i>Geobacillus thermoleovorans</i>     | RL          |
| WP_064213580.1 | 98%               | <i>Geobacillus stearothermophilus</i>  | GS27        |
| WP_033016936.1 | 98%               | <i>Geobacillus stearothermophilus</i>  | ATCC 7953   |
| WP_055358891.1 | 98%               | <i>Geobacillus sp.</i>                 | Sah69       |
| WP_121625896.1 | 98%               | <i>Geobacillus stearothermophilus</i>  | FHS-PCGT429 |
| WP_096225890.1 | 98%               | <i>Geobacillus sp.</i>                 | FJAT-46040  |
| WP_053532223.1 | 98%               | <i>Geobacillus stearothermophilus</i>  | ATCC 12980  |
| KZE96909.1     | 97%               | <i>Geobacillus stearothermophilus</i>  | C1BS50MT1   |
| WP_095858800.1 | 97%               | <i>Geobacillus stearothermophilus</i>  | DSM 458     |
| WP_023633350.1 | 96%               | <i>Geobacillus sp.</i>                 | MAS1        |
| WP_144329852.1 | 96%               | <i>Geobacillus sp.</i>                 | LEMMJ02     |
| WP_066227285.1 | 95%               | <i>Geobacillus jurassicus</i>          | NBRC 107829 |
| WP_044736072.1 | 95%               | <i>Geobacillus kaustophilus</i>        | Et2/3       |
| WP_041267823.1 | 94%               | <i>Geobacillus sp.</i>                 | JF8         |
| AGT30711.1     | 94%               | <i>Geobacillus sp.</i>                 | JF8         |
| WP_081209836.1 | 94%               | <i>Geobacillus sp.</i>                 | 46C-lia     |
| WP_033844707.1 | 93%               | <i>Geobacillus subterraneus</i>        | PSS2        |
| WP_033018780.1 | 93%               | <i>Geobacillus icigianus</i>           | G1w1        |
| WP_081157433.1 | 89%               | <i>Geobacillus sp.</i>                 | 47C-lib     |
| WP_087959824.1 | 89%               | <i>Geobacillus thermodenitrificans</i> | T12         |
| WP_099233044.1 | 88%               | <i>Geobacillus thermodenitrificans</i> | ID-1        |
| KJE28979.1     | 94%               | <i>Geobacillus kaustophilus</i>        | Et7/4       |

3 Query coverage was 100%, except for sequence KJE28979.1 where it was 79%.

4

1 **Supplementary file 4**

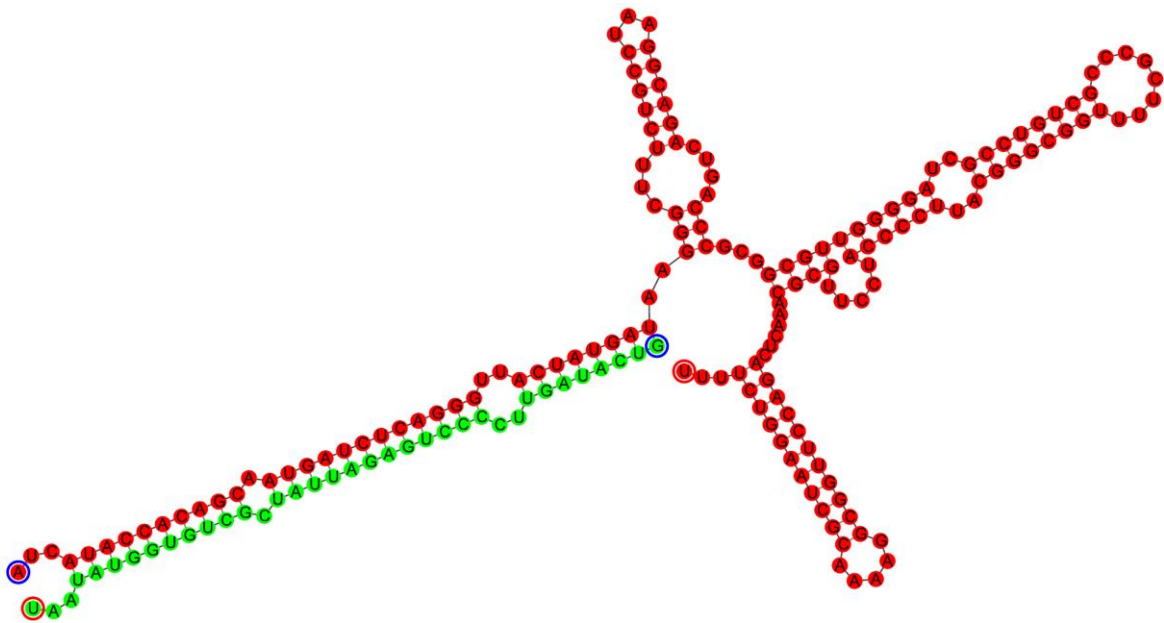

2

3 Predicted structure of crRNA:tracrRNA duplex. Sequence in green corresponds to crRNA excluding  
4 the spacer, and the sequence in red the tracrRNA sequence. 5' ends are highlighted with blue circle  
5 and 3' ends with red circles. Spacer sequence of crRNA is not shown. RNA folding predicted using  
6 Geneious 9.1.8.

7

8

1 **Supplementary file 5**

2 **A:**

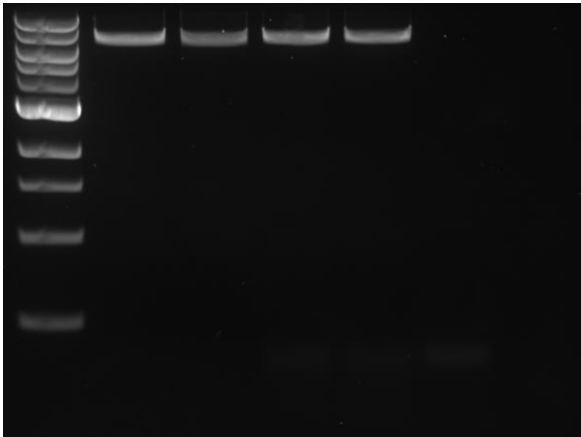

3

4 **B:**

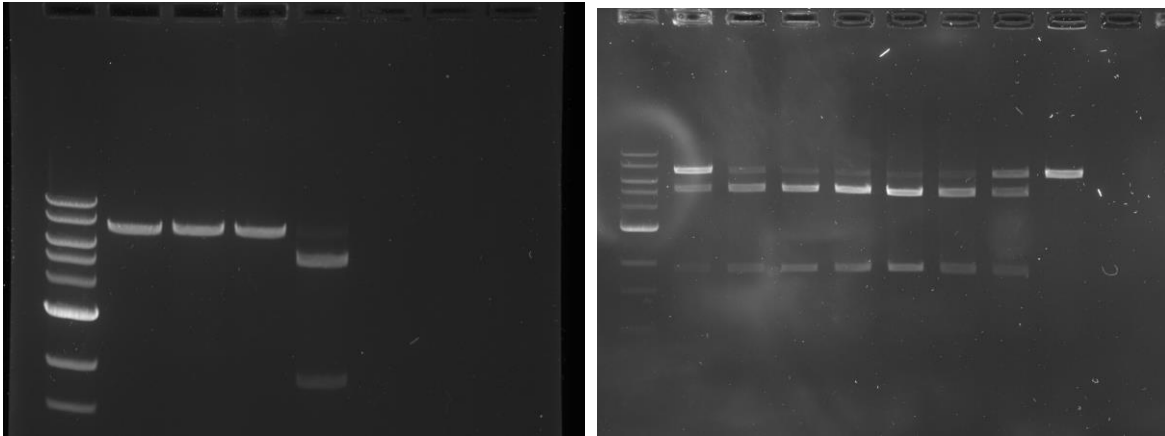

5

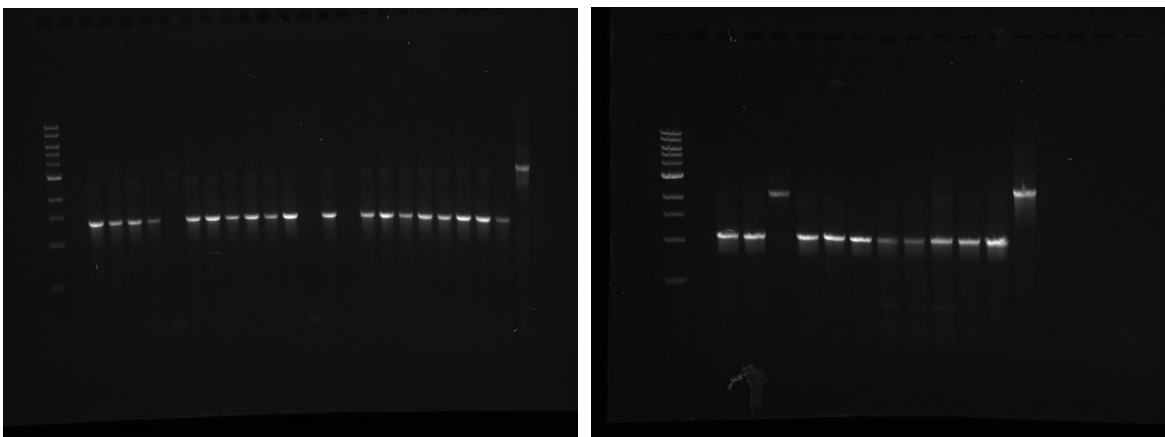

6

7 **A: *In vitro* cleavage assay using a non-target gRNA.** CaldoCas9, a DNA ‘target’ and gRNA containing a  
8 non-target spacer were incubated in various combinations at 55°C and the products separated on an  
9 agarose gel. Samples were loaded onto gel in the same sequence as indicated for figure 2A in the  
10 main test, and the ladder sizes are the same.

11 **B: Unprocessed images of agarose gels presented in the main text of the manuscript.** In top row,  
12 corresponding to Figure 2 in main text, and in bottom row, corresponding to Figure 4 in main text.

13

# 1 Supplementary file 6

2

A. Frequency in digested library

|    | A    | C    | G    | T    |
|----|------|------|------|------|
| 1  | 14.4 | 42   | 19.1 | 24.5 |
| 2  | 52.8 | 19.1 | 14.7 | 13.4 |
| 3  | 25.5 | 32   | 19.1 | 23.5 |
| 4  | 35.4 | 14.9 | 30.7 | 19.1 |
| 5  | 3.3  | 0.8  | 95.7 | 0.2  |
| 6  | 35   | 20.6 | 8.8  | 35.6 |
| 7  | 66.4 | 23   | 5.5  | 5.1  |
| 8  | 89.6 | 2    | 4.3  | 4.1  |
| 9  | 25.7 | 23.8 | 24.1 | 26.4 |
| 10 | 36.2 | 20.5 | 18.2 | 25.1 |
| 11 | 28.7 | 23.1 | 25.6 | 22.6 |
| 12 | 31.8 | 24.8 | 17.9 | 25.6 |

B. Frequency in undigested library

|    | A    | C    | G    | T    |
|----|------|------|------|------|
| 1  | 28.6 | 19.2 | 23.1 | 29.1 |
| 2  | 22.7 | 19.4 | 24.9 | 33   |
| 3  | 24.1 | 22.3 | 21.6 | 32.1 |
| 4  | 23.9 | 20.8 | 28.5 | 26.8 |
| 5  | 23.5 | 21.1 | 28.6 | 26.8 |
| 6  | 19.4 | 22.5 | 23.9 | 34.3 |
| 7  | 19.2 | 24.1 | 25   | 31.7 |
| 8  | 24.6 | 22.5 | 18.5 | 34.4 |
| 9  | 21.2 | 24   | 26.3 | 28.6 |
| 10 | 22.9 | 18.6 | 24.9 | 33.6 |
| 11 | 22   | 23.4 | 26.9 | 27.7 |
| 12 | 24.6 | 20.1 | 26.6 | 28.7 |

C. Over/underrepresentation in undigested library (B/25)

|    | A    | C    | G    | T    |
|----|------|------|------|------|
| 1  | 1.14 | 0.77 | 0.92 | 1.16 |
| 2  | 0.91 | 0.78 | 1.00 | 1.32 |
| 3  | 0.96 | 0.89 | 0.86 | 1.28 |
| 4  | 0.96 | 0.83 | 1.14 | 1.07 |
| 5  | 0.94 | 0.84 | 1.14 | 1.07 |
| 6  | 0.78 | 0.90 | 0.96 | 1.37 |
| 7  | 0.77 | 0.96 | 1.00 | 1.27 |
| 8  | 0.98 | 0.90 | 0.74 | 1.38 |
| 9  | 0.85 | 0.96 | 1.05 | 1.14 |
| 10 | 0.92 | 0.74 | 1.00 | 1.34 |
| 11 | 0.88 | 0.94 | 1.08 | 1.11 |
| 12 | 0.98 | 0.80 | 1.06 | 1.15 |

D. Digested library normalized for under/overrepresentation (A/C)

|    | A    | C    | G    | T    | Sum |
|----|------|------|------|------|-----|
| 1  | 12.6 | 54.7 | 20.7 | 21.0 | 109 |
| 2  | 58.1 | 24.6 | 14.8 | 10.2 | 108 |
| 3  | 26.5 | 35.9 | 22.1 | 18.3 | 103 |
| 4  | 37.0 | 17.9 | 26.9 | 17.8 | 100 |
| 5  | 3.5  | 0.9  | 83.7 | 0.2  | 88  |
| 6  | 45.1 | 22.9 | 9.2  | 25.9 | 103 |
| 7  | 86.5 | 23.9 | 5.5  | 4.0  | 120 |
| 8  | 91.1 | 2.2  | 5.8  | 3.0  | 102 |
| 9  | 30.3 | 24.8 | 22.9 | 23.1 | 101 |
| 10 | 39.5 | 27.6 | 18.3 | 18.7 | 104 |
| 11 | 32.6 | 24.7 | 23.8 | 20.4 | 101 |
| 12 | 32.3 | 30.8 | 16.8 | 22.3 | 102 |

E. Normalized frequency in digested library % (D/Sum)

|    | A   | C   | G   | T   |
|----|-----|-----|-----|-----|
| 1  | 12% | 50% | 19% | 19% |
| 2  | 54% | 23% | 14% | 9%  |
| 3  | 26% | 35% | 22% | 18% |
| 4  | 37% | 18% | 27% | 18% |
| 5  | 4%  | 1%  | 95% | 0%  |
| 6  | 44% | 22% | 9%  | 25% |
| 7  | 72% | 20% | 5%  | 3%  |
| 8  | 89% | 2%  | 6%  | 3%  |
| 9  | 30% | 25% | 23% | 23% |
| 10 | 38% | 26% | 18% | 18% |
| 11 | 32% | 24% | 23% | 20% |
| 12 | 32% | 30% | 16% | 22% |

F. Normalized frequency in digested library relative to most common base

|    | A    | C    | G    | T   |
|----|------|------|------|-----|
| 1  | 23%  | 100% | 38%  | 39% |
| 2  | 100% | 42%  | 25%  | 17% |
| 3  | 74%  | 100% | 61%  | 51% |
| 4  | 100% | 49%  | 73%  | 48% |
| 5  | 4%   | 1%   | 100% | 0%  |
| 6  | 100% | 51%  | 20%  | 58% |
| 7  | 100% | 28%  | 6%   | 5%  |
| 8  | 100% | 2%   | 6%   | 3%  |
| 9  | 100% | 82%  | 76%  | 76% |
| 10 | 100% | 70%  | 46%  | 47% |
| 11 | 100% | 76%  | 73%  | 63% |
| 12 | 100% | 96%  | 52%  | 69% |

3

4 In tables A and B are the observed frequency of bases A, C, G, and T (top row) in nucleotides 1-12  
 5 (first column) downstream of the Cas9:gRNA targeted sequence, as revealed by sequencing before  
 6 (table B) and after (table A) Cas9 digestion. In tables C-F the observed frequency of bases in the  
 7 digested library are normalized with the frequency in the undigested library. Calculations are  
 8 indicated in brackets in the title of tables C-F.

1 **Supplementary file 7**

2 High %GC Codon optimized gene encoding CaldoCas9:

3 5' -

4 ATGCGCTACAAGATCGGCCTGGACATCGGCATCACCAGCGTGGGCTGGGCGGTGATCAACCTCGATATCCGCGGATCGAGG  
5 ACCTGGGTGTCCGGATTTTCGATCGCGCCGAAAATCCGCAAACGGGAGAAAGCCTGGCCCTGCCCGTGGCTGGCGCGCAG  
6 CGCCCGCGTGCCTCCGCCCGCGAAACATCGCCTGGAACGCATTCGCCGTCTGATCATCCGGGAAGGGATCCTGACGAAG  
7 GAGGAGCTGGACAAGCTGTTTGAGGAGAAGCACGAGATCGATGTCTGGCAGCTCCGGGTGGAGGCGCTGGACCGGAAGCTCA  
8 ACAACGACGAGCTGGCGCGGGTCTGCTGCATCTGGCCAAGCGCCGGGCTTCAAAGCAACCGCAAGTCGGAACGCTCGAA  
9 CAAGGAGAACTCGACGATGCTGAAGCACATCGAGGAGAACCGCCATCCTGTCTCGTATCGCACCGTGGCGAGATGATC  
10 GTGAAAGACCCGAAGTTTGCCTGCACAAACGTAACAAGGGCGAGAACTACACCAATACCATTGCCCGCAGCAGCTGGAGC  
11 GGGAGATCCGGCTCATCTTCTGAAGCAGCGCAATTTGGGAACATGTCGTGCACCGAGGAGTTCGAGAACAATAATTGC  
12 CATCTGGGCTCGCAGCGCCGGTGGCGTGAAGGACGACATTGAGAAGAAGGTGGGTTTTCGACGTTCAACCGAAGGAG  
13 AAGCGGGCGCCGAAAGCCACGTACACGTTCCAGTGTTCATCGCGTGGGAGCACATCAACAACTCCGGTGTATCTCGCCGT  
14 CGGGGACCCGCGCCTGACGGATGAGGAACGGCGCCTCTGTACGAGCAGGCCTTCCAGAAGAACAAGATCACGTACCACGA  
15 CATCCGCACGCTGCTGCACCTGCCGGATGATACGATTTTTAAGGGCATTGTGTATGACCGTGGCGAGTCGCGGAAACAGAAC  
16 GAGAACATCCGGTTCTGGAGCTCGACGCGTACCACCAAATCCGGAAGGCCGTGGACAAAGTGTACGGCAAAGGCAAATCGT  
17 CCTCTTCTGCCGATCGACTTCGATACCTTCGGATATGCCCTGACCTGTTCAAAGACGACGCGGACATTCGGAGCTATCT  
18 CCGGAACGAATACGAGCAGAACGGTAAACGCATGCCGAACCTGGCCAACAAGGTCTACGACAATGAATCATCGAAGAAGT  
19 CTCAACCTGTCTTACGAAAGTTTGGCCACCTGAGCCTGAAGGCCCTGCGCAGCATCCTCCCCTACATGGAGCAGGGCGAAG  
20 TGTACAGCTCGGCCTGTGAGCGCGGGGATACACCTTACGGGCCCAAGAAGAAGCAAAGACGATGCTGCTGCCGAACAT  
21 TCCGCCATCGCAACCCCGTGGTTCATGCGGGCCCTGACGCAGGCCCGGAAGGTGGTGAACGCGATCATCAAGAAGTACGGA  
22 AGCCCGTGTGATCCACATCGAAGTGGCCCGGACCTGTGCGAGACGTTTCGACGAACGCCGAAAACCAAGAAGGAACAGG  
23 ATGAGAACCAGAAAGAACGAAACGGCCATCCGCCAGCTGATGGAGTACGGACTGACGCTGAATCCGACGGGTACGACAT  
24 CGTGAATTCAAACTGTGGTTCGGAGCAGAACGGCCGCTGCGCCTATTTCGCTGCAGCCATCGAAATCGAGCGGCTCCTGGAA  
25 CCGGGCTACACGGAGGTGGACCACGTCATTCGTAACCTCGCGCTCCCTGGATGACTCTACACCAACAAGGTGCTGGTCTCA  
26 CGAAGGAGAATCGCGAGAAGGGTAACCGCATCCCGGCCGAGTATCTGGGCGTGGGCACGGAGCGCTGGCAGCAGTTCGAGAC  
27 GTTTGTCTGACGAACAAACAGTTCAGCAAGAAGAAACGCGACCGGCTGCTGCGCCTGCATTACGACGAAAACGAGGAAACG  
28 GAGTTCAAGAACCAGCACTGAACGACACGCGTACATCAGCCGGTCTTCGCGAACATTCATCCGCGAGCACCTCAAGTTCG  
29 CGGAATCGGACGATAAGCAGAAGGTGTACACCGTCAACGGCCGTGTGACGGCGCATCTGCGCTCGCGTGGGAGTTCACAA  
30 GAACCGCAAGAATCGGATCTGCACCACGCCGTGGACGCCGTGATCGTGGCCTGCACGACCCCGTGGACATCGCAAGGTG  
31 ACCGCTTCTATCAGCGCCGCGAGCAGAACAAGGAACTGGCCAAGAAGACCGAACCAGCATTTCGCGAGCCGTGGCCGATT  
32 TTGCCGATGAGCTGCGCGCGCCTGTGCAAGCACCCGAAAGAATCGATCAAGGCCCTGAACCTGGGGAACTATGACGACCA  
33 GAAGTGGAGTCCCTGCAGCCGTTCTGCTCTCCCGATGCCAAGCGCAGCGTACGGGCGCGGCCATCAGGAAACGCTG  
34 CGCCGCTACGTGGGATCGACGAACGTTCCGGGAAGATTGAGACGGTGGTAAAACCAAGCTGAGCGAAATCAAGCTCGATG  
35 CGTCCGGCCACTTCCATGTACGGGAAGGAGAGCGATCCCCGTACCTACGAGGCGATCCGGCAGCGCCTGCTGGAACACAA  
36 CAACGACCCCAAGAAAGCCTTTCAGGAGCCCTCTACAAGCCGAAGAAGAACGGTGTGAGCCGGGCCCGGTTCATTCGGACCGT  
37 AAGATCATCGACACGAAGAACCAGGTGATTCGCTGAACGATGGGAAAACGGTGGCCTACAACCTCGAATATCGTGCGGGTGG  
38 ACGTGTTCGAGAAGGACGGCAAGTACTACTGCGTCCCCGTCTATACGATGGACATCATGAAGGGCATCTGCCAATAAGGC  
39 CATTGAGCCGAACAAGCCGTACAGCGAATGGAAGGAGATGACGGAGGACTACACGTTCCGGTTCGCTCTACCCCAACGAT  
40 CTGATCCGCATCGAAGTCCCGCTGAAAAGATCATTAAAGACGGCCGGCGGCGAGGAAATCAAATCAAGGATCTCTTTGCGT  
41 ACTACAAAACCATCCACTCGGGGACCGCCGGCTGGAGCTGGTACGCCAGCTGCTCGTTCAGCCTGTCCGGCGTGGGTTT  
42 GCGCACGCTGAAGCGCTTGAAGAAGTACCAGGTGGACGTGCTGGGCAACATCTACAAAGTGCAGCGCGAGAAGCGGGTGGG  
43 CTGGCGAGCTCGGCCACAGCAAGACCGGTGAGACGATTCGCCCGCTGCAGTCGACGCGGGACTAG

44



1 **Supplementary file 8**

2 **A**

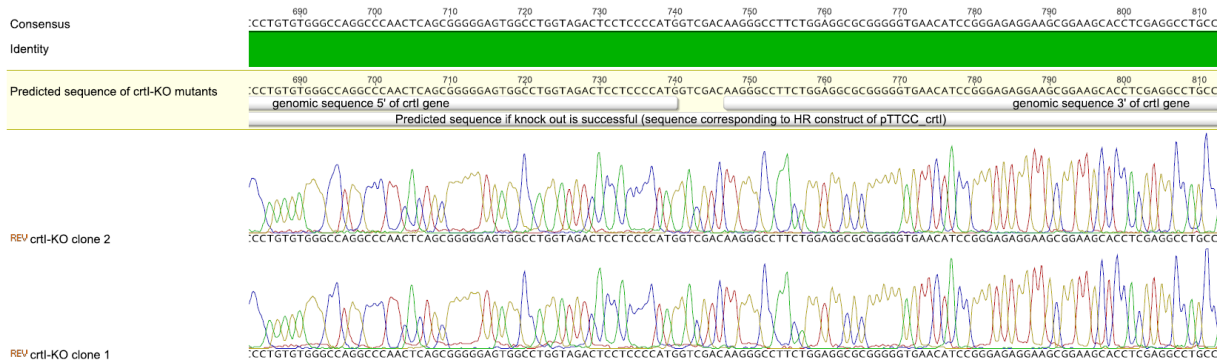

3

4 **B**

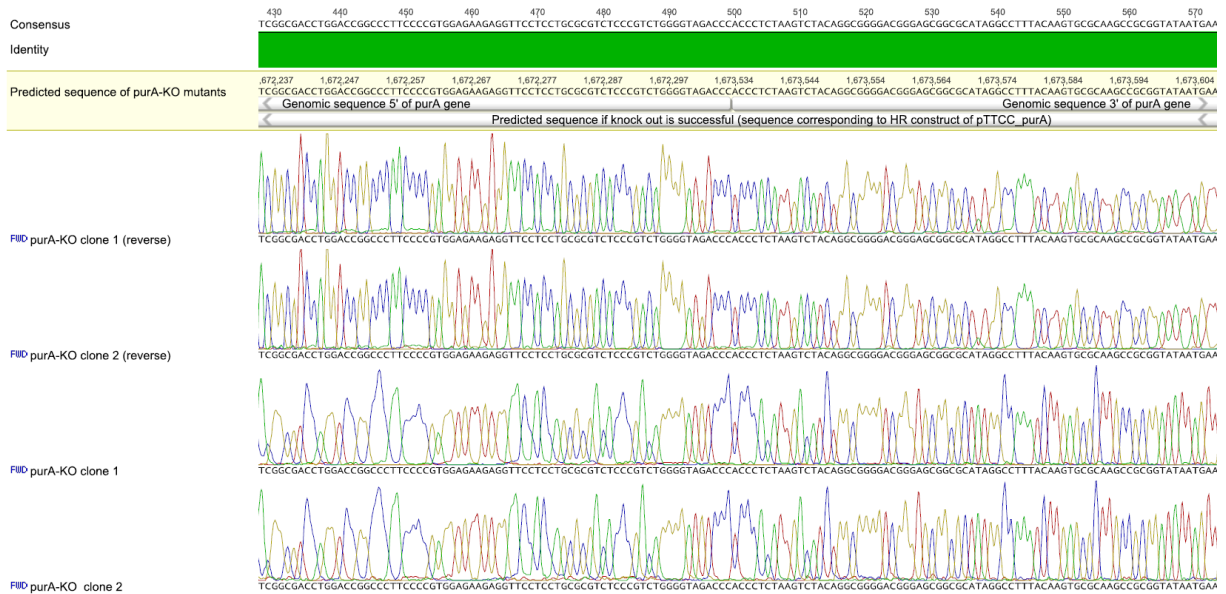

5 **Chromatograms from sequencing of mutant clones, *crtI*-KO (panel A) and *purA*-KO (panel B).**

6 The genomic regions surrounding gene *crtI* were amplified with primers F\_Tthp\_60 and R\_Tthp\_60,  
 7 and for *purA* with primers PurA\_Verify\_F and PurA\_Verify\_R (the primers are not complimentary to  
 8 the respective pTTCC genome editing plasmids). The same primers were used for BigDye reactions,  
 9 performed in duplicate per primer, and the products sequenced. The sequencing data were analyzed  
 10 in Geneious 9.1.8 software. Ends were trimmed with standard settings (error probability limit 0.01).  
 11 The trimmed sequences were mapped to a reference consisting of the predicted genomic sequence  
 12 of KO mutants (track highlighted in yellow color). Results were comparable between the two  
 13 technical replicates, and therefore the results from only one is shown. Sequencing with primer  
 14 F\_Tthp\_60 was not informative because the length of the reads did not span across the edited  
 15 genomic region.  
 16

1 **Supplementary file 9**

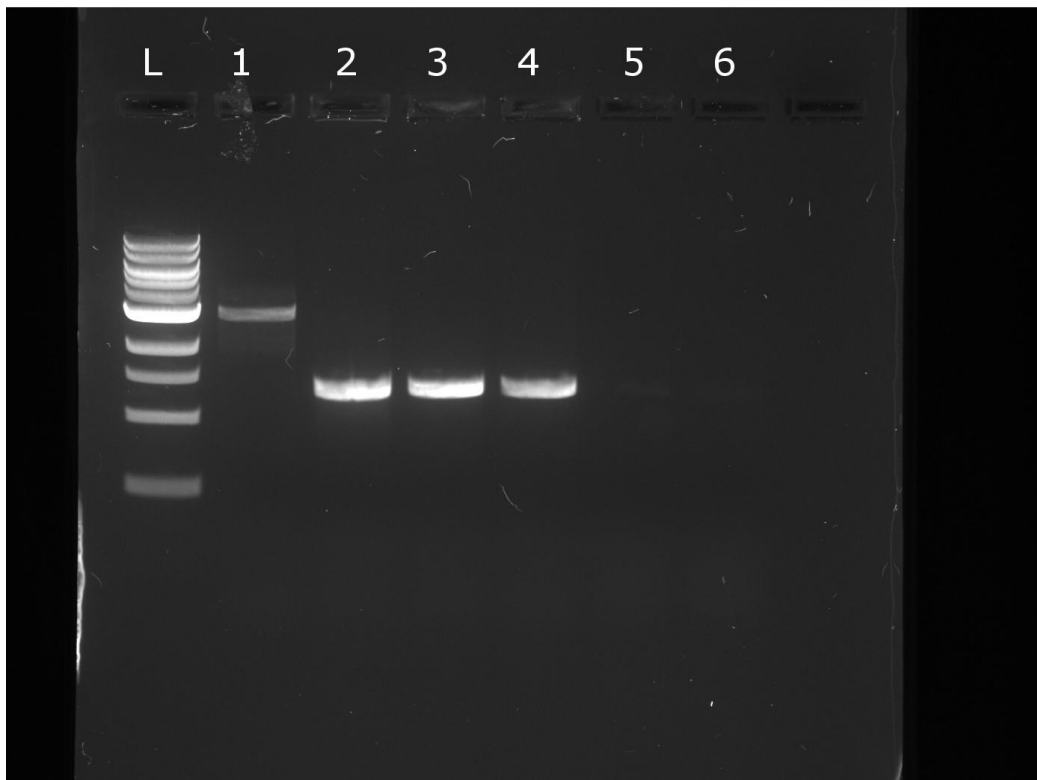

2

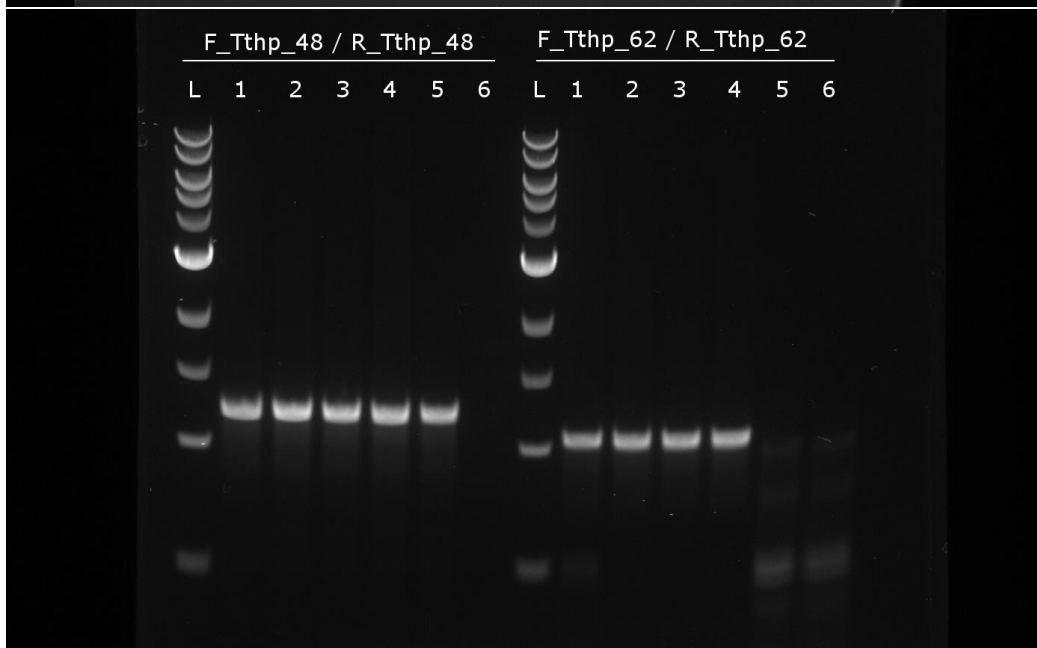

3

4 **Agarose gel electrophoresis of amplicons after PCR** using primer pairs F\_Tthp\_60 and R\_Tthp\_60  
5 (top image, expected amplicon size 2891 bp in WT) F\_Tthp\_48 and R\_Tthp\_48 (bottom left image;  
6 expected amplicon size 1227 bp; amplifies a locus approximately 12 kb upstream of *crtI*), and  
7 F\_Tthp\_62 and R\_Tthp\_62 (bottom right image; expected amplicon size 1045 bp; amplifies a locus  
8 spanning a sequence 0.7-1.7 kb downstream of *crtI*). Sample 1 was WT *T. thermophilus*, samples 2-4  
9 were cells transformed with pTTCC\_*crtI*, and samples 5-6 were cells transformed with pTTCC\_*crtI*\_s.  
10 Ladder was 1 kb DNA ladder from NEB.

1 **Supplementary file 10**

2 A plasmid map illustrating vector used to express CaldoCas9 in *E. coli*

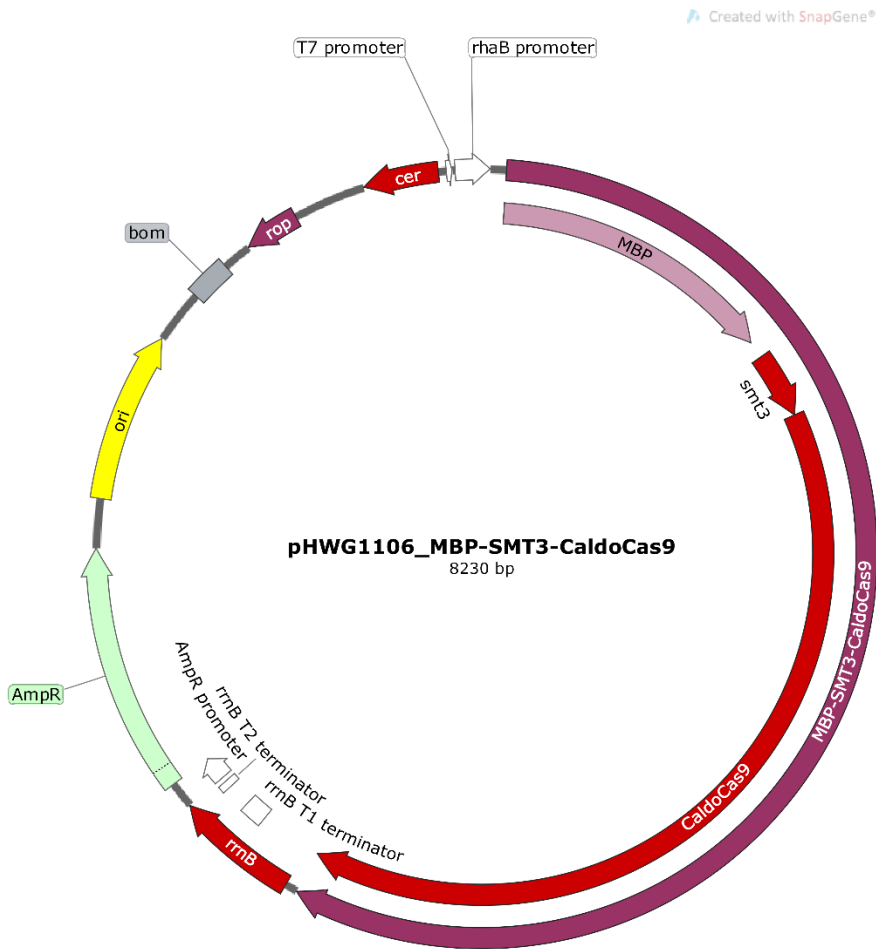

3

4

1 **Supplementary file 11**

2 A list of primers used in the study:

| Primer name                   | Primer sequence 5'-                                                          |
|-------------------------------|------------------------------------------------------------------------------|
| F_GA_gbCas9Ropt_MalE_pHWH1106 | CGTGAACAGATTGGTGGCCGCTACAAGATCGGCCTGG                                        |
| R_GA_gbCas9Ropt_MalE_pHWH1106 | GATATCTTAATGATGATGATGATGATGAGCTAGTCCCGCTGCGACTG                              |
| R_sgRNA_scaffold              | AAAAGACCTTAGCGTTTTCC                                                         |
| MM_gbsgRNA_rtTA_2             | CCTCTAATACGACTCACTATAGGGCTAAAGTGCATCTCGGCACCCGCCAAGTCATAGTTCCCTGAGATTATCG    |
| GBsgRNAs6                     | CCTCTAATACGACTCACTATAGGGAGTTTTAGGCCGTAGCGGCTCGAATACGGGTCATAGTTCCCTGAGATTATCG |
| gbS6_PAMseq_F                 | AAGGATCCCGGGTACCGAGCTGCTAGTTTTAGGCCGTAGCGGCTCGAATACG                         |
| gbS6_PAMseq_pos1to4_R         | TGACCATGATTACGAATTCGTTGTTTTNNNNCCGTATTCGAGCCGCTACG                           |
| gbS6_PAMseq_pos5to8_R         | TGACCATGATTACGAATTCGTTGNNNNCTGCCGATTCGAGCCGCTACG                             |
| gbS6_PAMseq_pos9to12_R        | TGACCATGATTACGAATTCNNNNTTCTCGCGTATTCGAGCCGCTACG                              |
| TK-117                        | CGGCATTCCTGCTGAACCGCTCTCCGATCT                                               |
| TK-117*                       | GATCGGAAGAGCGGTTCCAGCAGGAATGCCG                                              |
| pUC-dir**                     | GCCAGGGTTTTCCAGTCACGA                                                        |
| TK-117_seq                    | gtctctgggctcggagatgtgtataagagacagCGGCATTCCTGCTGAACCGCTCTCCGATCT              |
| pUC-dir_seq                   | tcgtggcagcgtcagatgtgtataagagacagGCCAGGGTTTTCCAGTCACGA                        |
| R_glib_PAMverif**             | GTACCGAGCTGCTAGTTTTAGGC                                                      |
| F_pLEI250_delBbsI             | ATGGGACGACCGGGCCCTGGGGGCCCAA                                                 |
| R_pLEI250_delBbsI             | GCCCGTCTCCATTGCCGCGATTATAC                                                   |
| F_gbCas9R_NdeI                | GGGAATCCATATGCGCTACAAGATCGGCCTGGAC                                           |
| R_gbCas9R_HindIII             | CCGGGAAGCTTCTAGTCCCGCTCGACTGCAGC                                             |
| Q5SDM_4/13_F                  | AACTGGCCAAAAGACCGAAC                                                         |
| Q5SDM_4/13_R                  | CCTTGTCTGCTCGCGGC                                                            |
| pLEIseqR_trcgRNA              | GTGAGAGGTGGGAGAAG                                                            |
| crtI_TT_s3_F                  | TGGACACGGCCCGGCTCATCGCCACGACCTGGG                                            |
| crtI_TT_s3_R2                 | TGACCCAGGTCTGGGGCGATGAGCCGGCCGCTG                                            |
| F2_GA_crtI3end                | CCCCATGGTCGACAAGGGCTTCTGGAGGCGC                                              |
| R2_GA_crtI3end                | CGGAATTCGGTGGTACCGCTCTCGCAGGGG                                               |
| F2_GA_crtI5end                | CGCTAAGGTCTTTGGTACCACCACTGGTCTCCGAG                                          |
| R2_GA_crtI5end                | GGCCCTTGTGACCATGGGGAGGAGTCTACCAG                                             |
| PurA_5F                       | AACGCTAAGGTCTTTGGTACCACCGACGCGGAGAGCCAG                                      |
| PurA_5R                       | TCCCGTCTGGGGTAGACCACCTCTAAGTCTACAGGC                                         |
| PurA_3F                       | CCTGTAGACTTAGAGGGTGGGTACCCAGACGGGAG                                          |
| PurA_3R                       | CTCGGAATTCGGTGGTACTCCCGACGAGAGCGTCCAC                                        |
| pTTCC_HR_amp_F                | CTGTCGCCCCTTTGG                                                              |
| pTTCC_HR_amp_R                | TCCTGCGTTATCCCTGATTCT                                                        |
| PurA_Spacer_2_F               | TGGACGTGGTCTCTTCTCCACGAGCCCGAGCG                                             |
| PurA_Spacer_2_R               | TGACCGCTGGGCTCTGGAGAAGAGGACCACG                                              |
| F_Tthp_60                     | CCCACTCAAGAGGCCAAAG                                                          |
| R_Tthp_60                     | CCCACCTCTTACCATCAC                                                           |
| PurA_Verify_F                 | TCGCCACCTCACCTTCCAG                                                          |
| PurA_Verify_R                 | ACCGCAAGTCCAGGTCGTC                                                          |
| bgal_amp_F                    | CACTGGGACTTCGCCCTAAG                                                         |
| bgal_amp_R                    | GTGAGGAGGTCCAAAAGGG                                                          |
| crtI_TT_s3_F                  | TGGACACGGCCCGGCTCATCGCCACGACCTGGG                                            |
| F_Tthp_48                     | TTCTCGGGAAGCTTACCAC                                                          |
| R_Tthp_48                     | GCCCGTATCTGTCCACGAT                                                          |
| F_Tthp_62                     | GTGATGGTGAAGGAGGTGGG                                                         |
| R_Tthp_62                     | CTTCTGGATCTCCTTCCGG                                                          |

3 \*5' phosphorylated

4 \*\*Indicated as P1 and P2 in Figure 2C in main text

5

1 **Supplementary file 12**

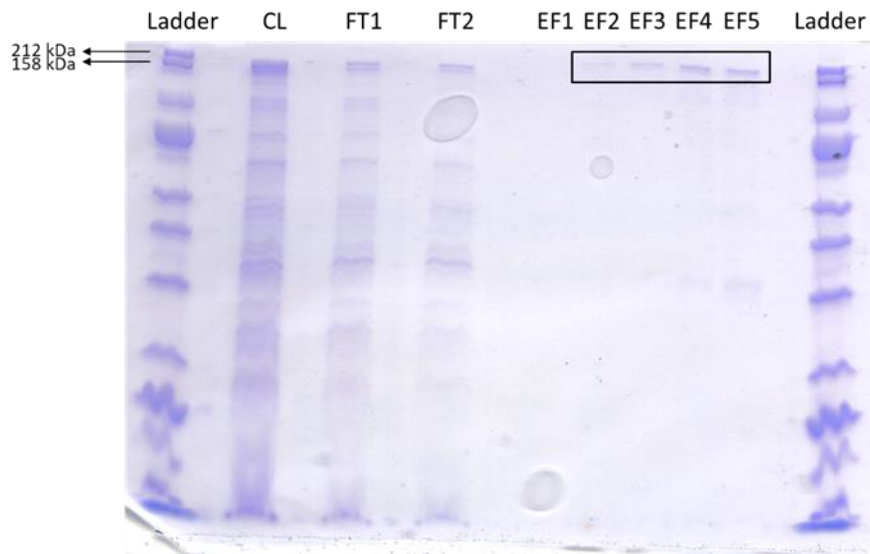

2

3 **SDS-PAGE on fractions from purification of CaldoCas9-MBP fusion protein on amylose column.**

4 CaldoCas9-MBP fusion protein is ~179,2 kDa, indicated for eluted fractions with a box. CL=Raw cell  
5 lysate; FT=Flow-through fractions 1 and 2; EF: Eluted fractions 1, 2, 3, 4 and 5.

6

1 **Supplementary file 13**

2 A CaldoCas9 gRNA scaffold sequence used to generate gRNA molecules *in vitro*:

3 5' -

4 GTCATAGTTCCCCTGAGATTATCGCTGTGGTATAATATCATACCACAGCAATGATCTCAGGGTTACTATGATAAG

5 GGCTTTCTGCCTAAGGCAGACTGACCCGCGGCGTTGGGGATCGCCTGTCGCCCGCTTTTGGCGGGCATTCCCAT

6 CCTTGCGCAAACCTCAGACCTTGGCGGAAAACGCTAAGGTCTTTT

7

1 **Supplementary file 14**

2 A DNA fragment used to clone the gRNA construct to generate pTTCC

3 5'-

4 CTGGTCCCGGGGTTACTGAGCTGTTGACAATTAATCATCCGGCTCGTATAATGTGTGGAACGTCTTCTAAGGA  
5 GGTCACATATGACCATGATTACGGATTCACTGGCCGTCGTTTTACAACGTCGTGACTGGGAAAACCCTGGCGTT  
6 ACCCAACTTAATCGCCTTGCAGCACATCCCCCTTTCGCCAGCTGGCGTAATAGCGAAGAGGCCCGCACCGATCG  
7 CCCTTCCCAACAGTTGCGCAGCCTGAATGGCGAATAGGAAGACTAGTCATAGTTCCCCTGAGATTATCGCTGTG  
8 GTATAATATCATACCACAGCAATGATCTCAGGGTACTATGATAAGGGCTTTCTGCCTAAGGCAGACTGACCCG  
9 CGGCGTTGGGGATCGCCTGTCGCCCGCTTTTGGCGGGCATTCCCATCCTTGCGCAAACCTCAGACCTTGGCGG  
10 AAAACGCTAAGGTCTTTTGGTACCACCGAATTCCG

# 1 Supplementary file 15

## Protocol for cloning spacers into pTTCC\*

### Protocol overview:

1. Design oligonucleotides containing a desired spacer sequence. Add 4bp overhangs complementary to BbsI restricted vector pTTCC:
   
5' - TGGANNNNNNNNNNNNNNNNNNNNNNNNNNNNN - 3'
   
3' - NNNNNNNNNNNNNNNNNNNNNNNNNNNNNCAGT - 5'
2. Anneal and phosphorylate oligos
3. Digest pTTCC with BbsI
4. Ligate annealed and phosphorylated oligos into BbsI restricted pTTCC
5. Transform ligation mix into NEBStable competent cells; culture O/N on L media agar plates with 30 µg/ml kanamycin
6. Culture a few clones in liquid media O/N in L+ Kan (30 µg/ml), miniprep, and confirm spacer insert by restriction and/or sequencing

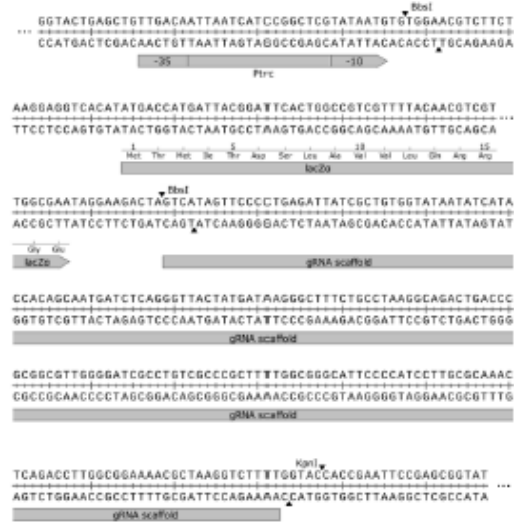

### Protocol details:

1. Design oligonucleotides containing a desired spacer sequence adjacent to a PAM.
 

The top-strand oligo should contain an overhang 5'-TGGG followed by the 5'-3' spacer sequence; The bottom-strand oligo should contain an overhang 5'-TGAC followed by the 5'-3' reverse complement of the spacer sequence; gRNAs tested in the present study contained a 30 nt spacer sequence. Other lengths may be suitable but have not been tested.

2. Anneal and phosphorylate the oligos:

**Mix:**  
 1 µl top-strand oligo (10 µM)  
 1 µl bottom-strand oligo (10 µM)  
 2 µl T4 DNA ligase buffer (M0202 NEB)  
 0.5 µl T4 PNK (M0236 NEB)  
 15.5 µl H<sub>2</sub>O

**Incubate mix:**  
 37°C for 60 minutes  
 95°C for 5 minutes  
 Cool to 10°C in steps, at a rate of -5°C/min

3. Digest pTTCC

**Mix:**  
 1 µg pTTCC  
 1 µl BbsI-HF (NEB R3539)  
 5 µl CutSmart buffer (NEB)  
 H<sub>2</sub>O to 50 µl

**Incubate mix:**  
 37°C for 1 hour  
 65°C for 20 minutes

Purification of the vector is not necessary, but may reduce background in the following steps

4. Ligate vector and oligos

**Mix:**  
 10-40 ng digested vector (step 3)  
 1 µl annealed oligos (step 2)  
 1 µl 10X T4 DNA ligase buffer (NEB)  
 0.5 µl T4 DNA ligase  
 H<sub>2</sub>O to 10 µl

**Incubate mix:**  
 24°C for 10 minutes

5. Transform NEBStable (C3040, NEB) according to manufacturer's instructions; plate on L agar media with 30 µg/ml kanamycin.

\*The protocol is adapted from instructions for spacer cloning into vector MUM3636 (addgene 43860) from the Joung lab (J. Keith Joung, Harvard Medical School)
